# Unique and combinatorial functions of *Fgf3* and *Fgf8* during zebrafish forebrain development

Jennifer Walshe and Ivor Mason\*

MRC Centre for Developmental Neurobiology, New Hunt's House, King's College London, Guy's Campus, London SE1 1UL, UK

\*Author for correspondence (e-mail: ivor.mason@kcl.ac.uk)

Accepted 2 June 2003

## SUMMARY

Complex spatiotemporal expression patterns of *fgf3* and *fgf8* within the developing zebrafish forebrain suggest their involvement in its regionalisation and early development. These factors have unique and combinatorial roles during development of more posterior brain regions, and here we report similar findings for the developing forebrain. We show that *Fgf8* and *Fgf3* regulate different aspects of telencephalic development, and that *Fgf3* alone is required for the expression of several telencephalic markers. Within the diencephalon, *Fgf3* and *Fgf8* act synergistically to pattern the ventral thalamus, and are implicated in the regulation of optic stalk formation, whereas loss of *Fgf3* alone results in defects in ZLI development. Forebrain

commissure formation was abnormal in the absence of either *Fgf3* or *Fgf8*; however, most severe defects were observed in the absence of both. Defects were observed in patterning of both the midline territory, within which the commissures normally form, and neuronal populations, whose axons comprise the commissures. Analysis of embryos treated with an FGFR inhibitor suggests that continuous FGF signalling is required from gastrulation stages for normal forebrain patterning, and identifies additional requirements for FGFR activity.

Key words: FGF, Zebrafish, Forebrain, Telencephalon, Diencephalon, Thalamus, Commissure, Zona limitans intrathalamica

## INTRODUCTION

The vertebrate forebrain forms through a series of complex morphological and molecular events and interactions. Initial divisions, telencephalon and diencephalon, are further subdivided to produce pallial and subpallial telencephalon and diencephalic derivatives: hypothalamus, ventral thalamus, zona limitans intrathalamica (ZLI), dorsal thalamus and pretectum (Fig. 1A). Eyes and optic stalks are derived as outpocketings from the diencephalon (Puelles et al., 2000; Rubenstein et al., 1998). Comparatively little is known about the molecular regulation of forebrain patterning, although fate mapping, gene expression analysis, and genetic and transgenic analyses have provided some mechanistic insights (Brown et al., 2001).

Forebrain patterning in zebrafish begins during early gastrulation stages (Grinblat et al., 1998), when telencephalic, diencephalic and retinal precursors already occupy distinct domains (Woo and Fraser, 1995). The Hedgehog signalling pathway is required for ventral forebrain development in zebrafish (Varga et al., 2001) and Wnt pathway antagonists, such as *hdl*, *boz* and *mbl*, are required for telencephalon formation (Heisenberg et al., 1996; Kim et al., 2000; Fekany-Lee et al., 2000; Heisenberg et al., 2001). Local patterning within the anterior forebrain depends upon another Wnt pathway antagonist, *tlc*, which is expressed at the anterior neural boundary (Houart et al., 1998; Houart et al., 2002). Once established, telencephalic and diencephalic subdomains can be

distinguished by their gene expression patterns (Wilson and Rubenstein, 2000; Hauptmann et al., 2002).

Fibroblast growth factors (Fgfs) regulate patterning events in the midbrain and hindbrain, and have synergistic actions when expressed in overlapping domains. Notably, *Fgf8* and *Fgf17*, expressed midbrain-hindbrain boundary (isthmus), regulate the patterning and later aspects of development of the adjacent territories (Crossley et al., 1996; Reifers et al., 1998; Shamim et al., 1999; Martinez et al., 1999; Liu et al., 1999; Irving and Mason, 1999; Irving and Mason, 2000; Xu et al., 2000; Reifers et al., 2000; Sato et al., 2001; Irving et al., 2002). There is also a combinatorial role for *Fgf8* and *Fgf3*, from presumptive rhombomere 4, in patterning the hindbrain (Walshe et al., 2002; Maves et al., 2002), and in induction of the adjacent otic placode (Phillips et al., 2001; Maroon et al., 2002; Leger and Brand, 2002).

An emergent theme is one of both unique and combinatorial functions for Fgfs in brain patterning. Several Fgfs are expressed within the developing forebrain (Mason et al., 1994; Mahmood et al., 1995; Crossley and Martin, 1995; Mahmood et al., 1996; McWhirter et al., 1997; Reifers et al., 2000; Crossley et al., 2001; Gimeno et al., 2002), and *Fgf8* has been assigned a role in forebrain development. Mutant mice carrying hypomorphic *fgf8* alleles have smaller forebrains with midline deletions (Meyers et al., 1998). A patterning function is supported by in vitro studies using both chick and mouse tissues (Shimamura and Rubenstein, 1997; Crossley et al.,

2001), by *in vivo* studies in the mouse (Fukuchi-Shimogori and Grove, 2001), and by analysis of the zebrafish *acerebellar* (*ace*) mutant (Shanmugalingam et al., 2000). Although detailed analyses are lacking, *fgf3* is also expressed in the forebrain, (Mahmood et al., 1996; Raible and Brand, 2001; Walshe et al., 2002) and its ectopic expression affects the expression of certain forebrain markers (Koshida et al., 2002).

We report a complex and dynamic expression pattern for *fgf3* in the zebrafish forebrain, which partially overlaps with that of *fgf8*. Using morpholino oligonucleotides to inhibit Fgf3 and Fgf8, both individually and together, we identify unique functions for Fgf3 in both telencephalon and several regions of the diencephalon, and in combinatorial actions with Fgf8. In addition, we report further roles for Fgf8 in forebrain development.

## MATERIALS AND METHODS

### Fish stocks

Zebrafish, *Danio rerio*, of the King's wild-type (kwt) strain were used throughout these studies. They were maintained at 28°C, and embryos were staged according to Kimmel et al. (Kimmel et al., 1995).

### Morpholino oligonucleotide injections

Fgf8, Fgf3 and Fgf control morpholino oligonucleotides (Gene Tools), at a concentration of 6 µg/µl, were injected into zebrafish embryos as previously described (Maroon et al., 2002). Embryos were dechorionated and incubated with the FGFR inhibitor SU5402, as previously described (Maroon et al., 2002), except that SU5402 stock solutions were prepared at 10 mM and diluted to 0.1 mM for use.

### In situ hybridisation

In situ hybridisation reactions were essentially performed as described previously (Shamim et al., 1999; Maroon et al., 2002), except that embryos younger than 24 hours post fertilisation (hpf) were not treated with proteinase K, and the hydrogen peroxide treatment was omitted.

### Cell death and division

Dividing cells were detected using an anti-phosphorylated histone H3 (ser 128) antiserum (Calbiochem), and apoptotic cells were detected using the DeadEnd™ colourimetric detection kit (Promega) as described (Maroon et al., 2002). Numbers of dividing cells, within an area measuring 200 µm by 300 µm encompassing the presumptive forebrain from four embryos at tailbud stage injected with either control morpholinos, Fgf8 morpholinos (Fgf8mo), Fgf3 morpholinos (Fgf3mo), or both Fgf8mo and Fgf3mo, were determined and subjected to a Student's *t*-test for statistical analysis.

## RESULTS

### *fgf8* and *fgf3* have unique and overlapping expression domains within the developing zebrafish forebrain

Expression of *fgf8* within the developing zebrafish forebrain has been reported previously (Reifers et al., 1998; Shanmugalingam et al., 2000), therefore only a brief description is presented here to facilitate comparison with *fgf3* expression. *fgf8* transcripts were first detected at the anterior margin of the forebrain primordium at the tailbud stage (Fig. 1B). During early somitogenesis transcripts accumulated within the dorsal telencephalon (Fig. 1C), and by late somitogenesis *fgf8* expression was detected within the anterior telencephalon, dorsal diencephalon, optic stalks, posterior hypothalamus and retina (Fig. 1D,E). At 30 hpf transcripts remained in the anterior telencephalon, optic stalks and posterior tuberculum, and were also detected in the epiphysis (Fig. 1F).

Descriptions of *fgf3* expression in zebrafish embryos have been reported previously (Phillips et al.,

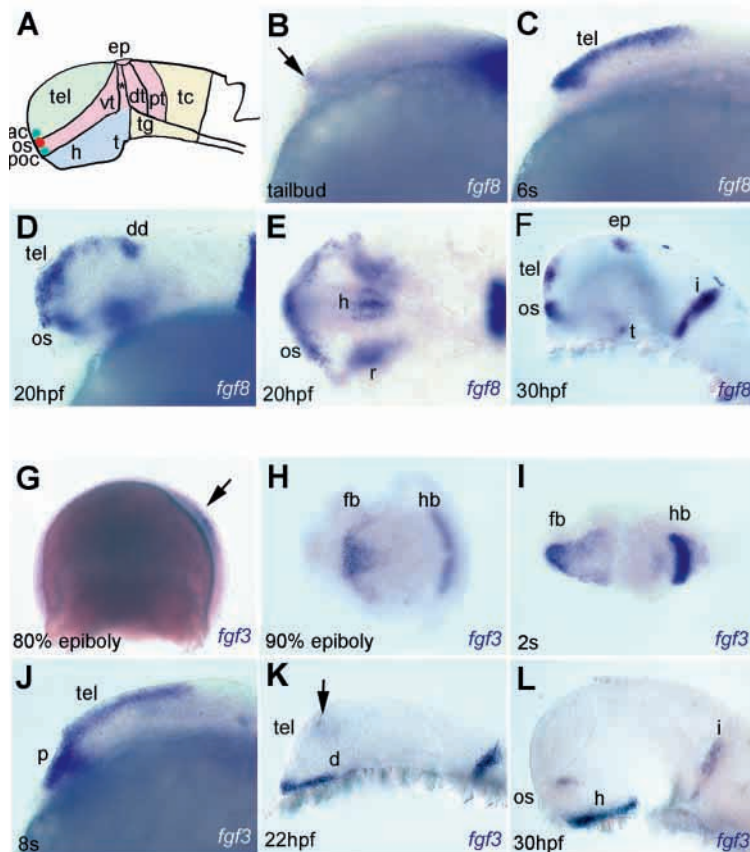

**Fig. 1.** Expression of *fgf8* (B-F) and *fgf3* (G-L) during development of the zebrafish embryo forebrain. Lateral (B-D,F,G,J-L) or dorsal (E,H,I) views with anterior to the left. The eye was removed in F and L to facilitate observation of expression in the brain. (A) Diagram depicting brain subdivisions and structures relevant to this study in a 24 hpf embryo. (B-F) *fgf8* expression at tailbud stage (B), during early somitogenesis (C), late somitogenesis (D,E; E, dorsal view focussed on the hypothalamic region) and 30 hpf (F). (G-L) *fgf3* expression. (G) onset at 80% epiboly (arrow). (H,I) Dorsal views at 90% epiboly (H) and 2s (I), showing *fgf3* transcripts in the forebrain and in presumptive rhombomere 4. Early (J) and late (K) somitogenesis, and 30 hpf (L). ac, anterior commissure; d, diencephalon; dd, dorsal diencephalon; dt, dorsal thalamus; ep, epiphysis; fb, forebrain; h, hypothalamus; hb, hindbrain; hpf, hours postfertilisation; i, isthmus; os, optic stalk; poc, post-optic commissure; pt, pretectum; r, retina; s, somites; t, posterior tuberculum; tc, tectum; tel, telencephalon; tg, tegmentum; vt, ventral thalamus. Asterisk indicates the zona limitans intrathalamica.

2001; Raible and Brand, 2001; Shinya et al., 2001; Maroon et al., 2002; Walshe et al., 2002; Maves et al., 2002; Leger and Brand, 2002); however, detailed analyses of the developing forebrain were not included in those studies. *fgf3* transcripts were first detected in anterior neuroectoderm at 80% epiboly (Fig. 1G), and at 90% epiboly *fgf3* expression was detected in cells of the presumptive forebrain and underlying prechordal hypoblast (Fig. 1H) (Phillips et al., 2001). At the beginning of somitogenesis, *fgf3* was expressed in cells of the anterior neural boundary (row 1 cells; Fig. 1H,I). At early somite stages, transcripts became confined to the dorsal telencephalon and the polster located anterior to the forebrain (Fig. 1J). At late somite stages, very low level *fgf3* expression remained in the telencephalon, while a new expression domain appeared in the ventral hypothalamus (Fig. 1K). *fgf3* transcripts remained within the ventral hypothalamus until at least 30 hpf and were additionally present in the optic stalks at this stage (Fig. 1L).

### Morpholino oligonucleotides effectively inhibit Fgf3 and Fgf8 functions but do not result in increased cell death or division in the forebrain

To analyse the involvement of Fgf3 and Fgf8 in forebrain development, 1- to 4-cell stage zebrafish embryos were injected with morpholino oligonucleotides to inhibit their translation. We have previously shown that these morpholino oligonucleotides compromise Fgf8 and Fgf3 function, phenocopying the *ace* (*fgf8*) mutant and rendering Fgf3 protein undetectable, respectively (Maroon et al., 2002; Walshe et al., 2002).

Fgf morpholino injection did not appear to affect cell division in the forebrain at either the tailbud or 10-somite stage (10s; Fig. 2A-H); this was confirmed by Student's *t*-test analyses. In addition, no changes in cell death were detected in forebrains at 10s (Fig. 2I-P) or at 24 hpf (data not shown).

### Fgf3 and Fgf8 are required for different aspects of telencephalic regionalisation

We investigated Fgf3 and Fgf8 function in telencephalic patterning. Embryos were injected with morpholinos and analysed at the tailbud stage for *emx1* expression at the anterior margin of the neural plate (Morita et al., 1995). Previous studies have shown that *emx1* expression at the tailbud stage is reduced in *ace* embryos (Shanmugalingam et al., 2000), and this was also observed following Fgf8mo injection (8/8). Injection of Fgf3mo alone ( $n=10/10$ ), or in combination with Fgf8mo ( $n=11/11$ ), resulted in a more severe phenotype, in which *emx1* expression was very weak or undetectable (Fig. 3A-D). Reduction of *emx1* expression was only transitory as later, at 24 hpf, expression was observed in the telencephalons of all embryos injected with Fgf8mo ( $n=17/17$ ), Fgf3mo ( $n=12/12$ ), and both Fgf morpholinos ( $n=13/13$ ). Furthermore, in many cases, expression was expanded into the subpallial domain of the telencephalon (Fig. 3E-H). These results implied that Fgf8 and Fgf3 were not required for specification of the pallial telencephalon, but that both were required for correct specification of the subpallial telencephalon.

Telencephalic patterning was further analysed by investigating the expression of two T-box transcription factors expressed in postmitotic neurons of the posterior dorsal telencephalon, *eomesodermin* (*eom*; *eomes* – Zebrafish Information Network) and *T-brain 1* (*tbr1*) (Mione et al., 2001), as Fgfs have been implicated in the regulation of T-box transcription factors in other embryological contexts (Smith et al., 1991; Griffin et al., 1998; Rossant and Cross, 2001). Expression of *eom* was greatly reduced or undetectable in the forebrains of embryos injected with either Fgf8mo ( $n=13/13$ ) or Fgf3mo ( $n=12/12$ ), or both morpholinos ( $n=18/18$ ; Fig. 3M-P). By contrast, telencephalic *tbr1* expression expanded anteriorly following injection of Fgf8mo ( $n=12/23$ ), but was

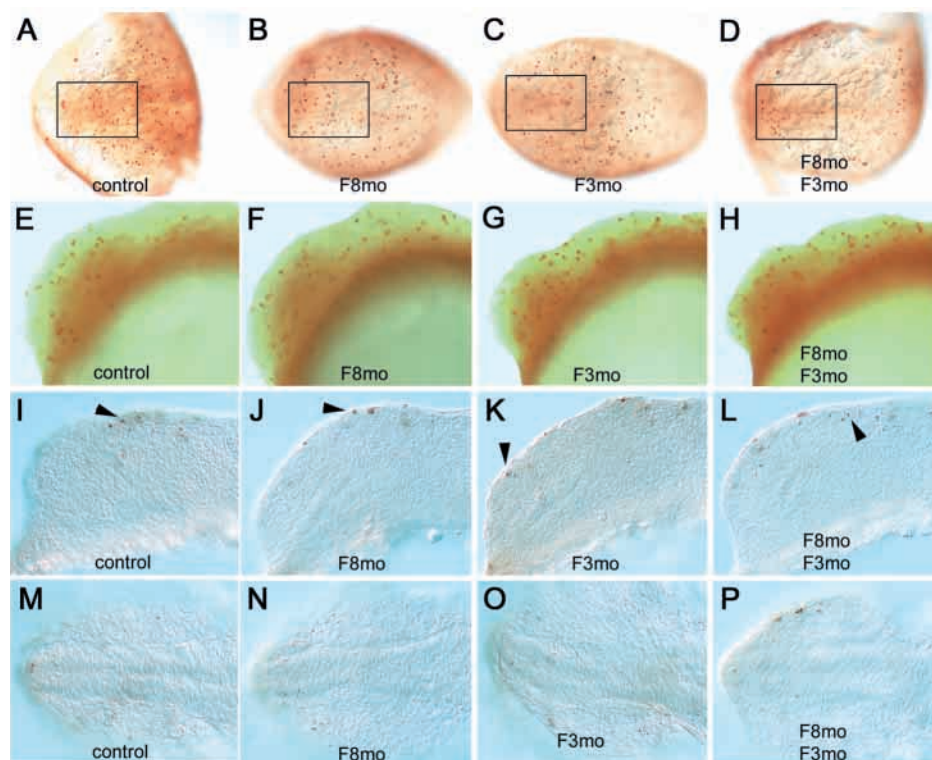

**Fig. 2.** Cell death and division in the forebrain are unaffected in embryos injected with Fgf morpholinos. (A-D) Dorsal views of the anterior neural plate at tailbud stage. Numbers of dividing cells within presumptive forebrain region (indicated by the rectangles) were counted and subjected to Student's *t*-test analyses. (E-H) Lateral views of whole-mounted 10s embryos, with anterior to the left, showing dividing cells. (I-L) Occasional apoptotic cells (arrowheads) detected dorsally in 10s embryos injected with control morpholino (I), Fgf8mo (J), Fgf3mo (K), or Fgf8 and Fgf3mo together (L). (M-P) Little cell death is detected in anterior neural tissue in 24 hpf embryos injected with control mo (M), Fgf8mo (N), Fgf3mo (O), or Fgf8 and Fgf3mo together (P).

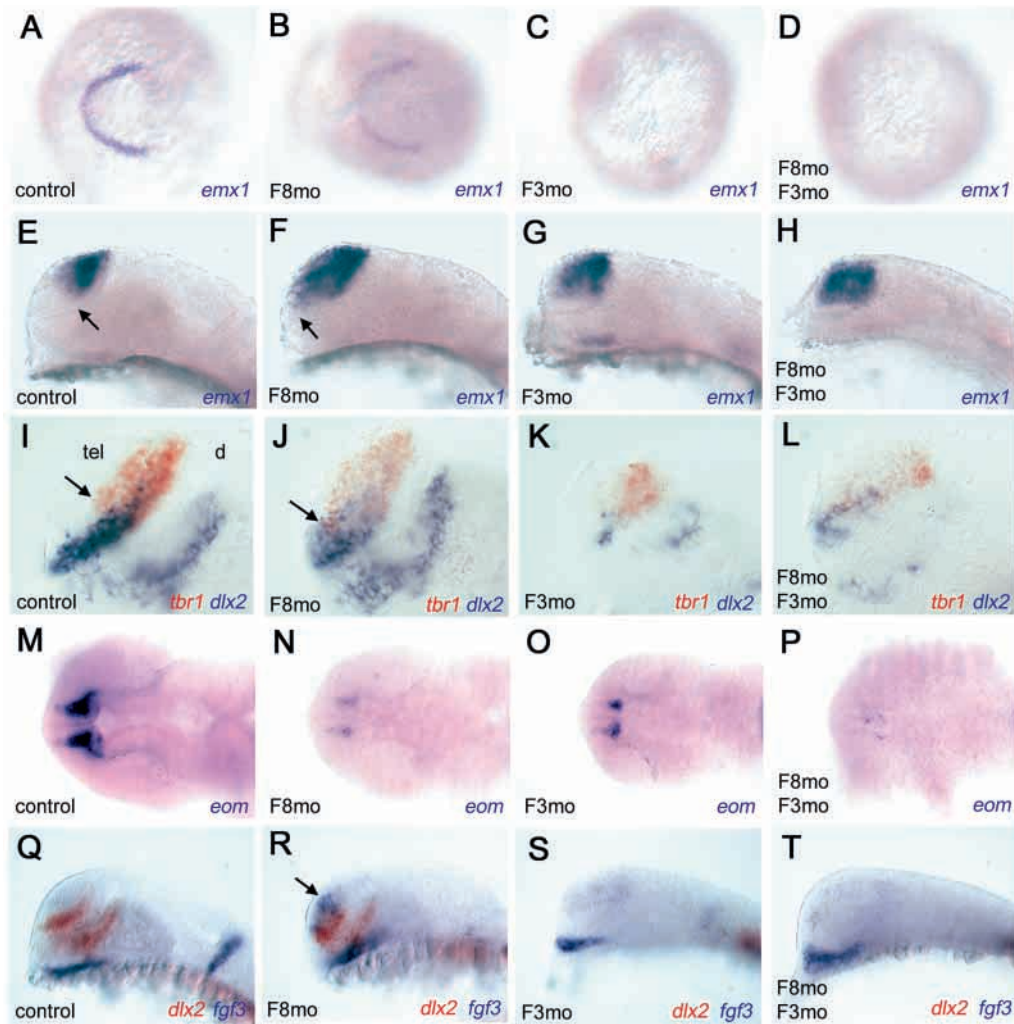

**Fig. 3.** Fgf3 and Fgf8 regulate telencephalic gene expression. Dorsal (A-D,M-P) or lateral (E-L,Q-T) views with anterior to the left. (A-D) *emx1* expression at the anterior margin of the forebrain primordium at tailbud stage. (A) *emx1* transcripts are detected in the presumptive anterior forebrain in control embryos but are reduced in embryos injected with Fgf8mo (B), and are undetectable in embryos injected with either Fgf3mo (C), or Fgf8mo and Fgf3mo (D). (E-H) *emx1* expression at 24 hpf. (E) *emx1* expression is limited to the pallial telencephalon in control embryos. Arrow indicates expression boundary. *emx1* transcripts are detected in both pallial and subpallial (arrow in F) telencephalon in embryos injected with Fgf8mo (F), Fgf3mo (G), or Fgf8mo and Fgf3mo (H). (I-L) *tbr1* (red) and *dlx2* (blue) expression at 24 hpf. (I) A control embryo: *dlx2* transcripts are found in the ventral thalamus and subpallial telencephalon, and extend into the posterior region of the pallial telencephalon. *tbr1* transcripts occupy the pallial telencephalon. (J) *tbr1* expression extends into the anterior subpallial telencephalon, partially overlapping *dlx2* expression, in embryos injected with Fgf8mo (compare arrows in I and J). *tbr1* and *dlx2* expression is reduced following injection with either Fgf3mo (K), or Fgf8mo and Fgf3mo (L). (M-P) Telencephalic *eom* expression at 24 hpf. (M) *eom* transcripts are detected in the telencephalon in control embryos. *eom* transcripts in the telencephalon are reduced or undetectable in embryos injected with Fgf8mo (N), Fgf3mo (O), or Fgf8mo and Fgf3mo (P). (Q-T) 28 hpf embryos, bisected along the AP axis, and mounted to show the internal brain surface following detection of *fgf3* (blue) and *dlx2* (red) transcripts. (Q) Control embryos express *dlx2* in the telencephalon and ventral thalamus, and *fgf3* in hypothalamus (and isthmus). (R) *fgf3* transcripts (arrow) are upregulated in the telencephalon in the absence of Fgf8. Loss of Fgf3 (S), or both Fgf3 and Fgf8 (T), results in the absence of *dlx2* expression. d, diencephalon; tel, telencephalon.

reduced following Fgf3mo injection ( $n=15/18$ ). When both morpholinos were injected the effects of the Fgf3 morpholino were dominant, with reduction of *tbr1* expression ( $n=18/22$ ; Fig. 3I-L).

*dlx2* is expressed in the zebrafish telencephalon and ventral thalamus from 13 hpf (Akimenko et al., 1994), and is required for the development of specific telencephalic neurons in mice (Qiu et al., 1995; Anderson et al., 1997). Injection of Fgf3mo resulted in variable reduction of *dlx2* expression in the telencephalon at 24 hpf ( $n=6/9$ ), but complete loss of

expression by 28 hpf ( $n=22/23$ ), whereas Fgf8mo-injection had no effect on telencephalic *dlx2* expression at either 24 hpf ( $n=11/11$ ) or 28 hpf ( $n=21/21$ ; Fig. 3I-L,Q-T). Double in situ hybridisation results demonstrated that expanded *tbr1* expression in the subpallial telencephalon following Fgf8mo injection was largely anterior and lateral to the more medially-located *dlx2* domain in that region (Fig. 3J).

Fgf3 and Fgf8 regulate the transcription of each other in the hindbrain (Walshe et al., 2002), and we found that in the absence of Fgf8, *fgf3* transcripts were strongly upregulated in

the telencephalon at 28 hpf, whereas the absence of Fgf3 protein did not produce such an effect. Upregulated *fgf3* transcripts were not detected in the telencephalons of embryos lacking both Fgf8 and Fgf3, although normal expression was detected in the hypothalamus ( $n=23/23$ ; Fig. 3I-L). Taken together, our data suggest that these two factors perform both combinatorial and unique functions in telencephalic patterning.

### Patterning of the diencephalon requires Fgf3 and Fgf8 function

We examined the effects of Fgf3 and Fgf8 inhibition on regional diencephalic development using markers of the hypothalamus [*shh*, *nk2.1b* (*titf1b* – Zebrafish Information Network), *fgf3*], ventral thalamus [*nk2.1b*, *shh*, *twhh*, *dlx2*, *pax6.1* (*pax6a* – Zebrafish Information Network)], dorsal thalamus (*pax6.1*), zona limitans intrathalamica (*shh*) and optic stalks (*pax2.1*; *pax2a* – Zebrafish Information Network).

#### Hypothalamus

*shh* is expressed in the hypothalamus, as well as in other regions of the brain at 30 hpf (Fig. 4A) (Krauss et al., 1993; Mathieu et al., 2002). Expression was substantially reduced in embryos injected with both Fgf8 and Fgf3 morpholinos ( $n=14/20$ ), but not in embryos injected with either morpholino alone (Fig. 4A-D). By contrast, hypothalamic *fgf3* expression was unaffected in embryos injected with the Fgf8mo and/or Fgf3mo (Fig. 3Q-T). *nk2.1b*, required for ventral forebrain development in mice (Kimura et al., 1996), is expressed in the zebrafish hypothalamus, as well as in the anterior ventral thalamus and subpallial telencephalon at 30 hpf (Fig. 4E). Previous studies showed reduced expression in the forebrains of zebrafish embryos deficient in *shh* signalling (Rohr et al., 2001). Unexpectedly, embryos co-injected with Fgf8mo and Fgf3mo had normal *nk2.1b* expression in the hypothalamic (and telencephalic) regions (Fig. 4H), despite *shh* being greatly reduced when both Fgf8 and Fgf3 were inhibited (Fig. 4D). These results suggest that residual Shh in embryos injected with both morpholinos may have been sufficient to regulate *nk2.1b*, or that expression of the latter was dependent upon earlier Shh signalling.

#### Ventral thalamus

The ventral thalamus is situated between the ventral telencephalon and hypothalamus (Fig. 1A). *nk2.1b* was expressed in the ventral thalamus in both control and Fgf8mo-injected embryos at 30 hpf (Fig. 4E,F), but was reduced or absent in embryos lacking Fgf3 ( $n=16/16$ ), or both Fgf8 and Fgf3 ( $n=17/17$ ), whereas other sites of expression were largely unaffected (Fig. 4G,H). To further examine regionalisation of the anterior ventral thalamus, we analysed embryos at 30 hpf for the expression of *tiggywinkle hedgehog* (*twhh*), which is normally expressed in the ventral midline of the developing neural tube, including that region of the ventral thalamus located between the optic stalks (Ekker et al., 1995). We found that embryos co-injected with Fgf3mo and Fgf8mo lacked *twhh* expression in the ventral thalamus ( $n=22/23$ ), whereas expression in embryos injected with either Fgf8mo ( $n=20/20$ ) or Fgf3mo ( $n=22/23$ ) was unaffected (Fig. 4I-L). Although these results clearly demonstrated a requirement for both *fgf8* and *fgf3* for *twhh* expression in the ventral thalamus, they differed from a previous study suggesting that loss of *Fgf8*

function alone was sufficient to reduce levels of *twhh* transcripts (Shanmugalingam et al., 2000). However, others have previously noted subtle differences between *ace* and Fgf8 morpholino-injected zebrafish (Draper et al., 2001).

To examine patterning of the posterior ventral thalamus, *dlx2* and *pax6.1* were analysed. As in telencephalon, injection of Fgf3mo resulted in reduced expression of *dlx2* in the ventral thalamus at 24 hpf ( $n=6/9$ ), and complete loss of expression by 28 hpf ( $n=23/23$ ), whereas Fgf8mo injection had no effect at either 24 hpf ( $n=11/11$ ) or 28 hpf ( $n=21/21$ ; Fig. 3I-L,Q-T). *pax6.1* expression marks posterior ventral thalamus, dorsal thalamus and pretectum at 28 hpf (Fig. 4M) (Püschel et al., 1992; Nornes et al., 1998; Hauptmann et al., 2002). *pax6.1* transcripts were detected in the diencephalons of all embryos at 28 hpf; however, the extent and pattern of expression was altered in embryos lacking either Fgf3, or both Fgf3 and Fgf8. In these embryos, ventral thalamic and dorsal thalamic domains of expression were reduced, and there was no clear separation between them, which is suggestive of defects in the ZLI (Fig. 4M-P). Overall, we found patterning defects in both the anterior and posterior ventral thalamus in embryos lacking Fgf3, with more severe defects in the anterior ventral thalamus in embryos lacking both Fgf8 and Fgf3.

#### Zona limitans intrathalamica

The ZLI expresses *shh*, may pattern the adjacent ventral and dorsal thalamus, and, in chick, has been identified as a lineage-restricted compartment (Zeltser et al., 2001). Embryos injected with either Fgf3mo ( $n=14/16$ ), or both Fgf3mo and Fgf8mo ( $n=20/20$ ), had substantially reduced expression of *shh* in the ZLI region at 30 hpf. In particular, expression was undetectable in the dorsal ZLI (Fig. 4A-D,A'-D').

#### Optic stalks

The optic stalks are transitory structures through which retinal axons extend to the diencephalon. *pax2.1* is expressed in the optic stalks and is required for their development (Krauss et al., 1991; Macdonald et al., 1997). At 18 hpf, two well-separated lateral domains of *pax2.1* expression corresponding to the optic stalks were present in embryos lacking either Fgf8 ( $n=13/13$ ) or Fgf3 ( $n=15/15$ ). By contrast, when both Fgfs were depleted these expression domains were fused at the midline ( $n=10/14$ ), providing further evidence for a patterning defect in the ventral thalamic midline and a potential problem with separation of the eye field (Fig. 4Q-T), although there was no evidence of cyclopia.

In summary, diencephalic patterning defects were observed in the ventral thalamus in the absence of Fgf3, and were more severe in the absence of both Fgf3 and Fgf8. Additional Fgf3-dependent defects were found in the ZLI, where *shh* was reduced and adjacent thalamic *pax6.1* domains merged.

#### Axon tract formation in the forebrain is disrupted in embryos lacking Fgf3 and Fgf8

At 16 hpf neurons appear as bilateral clusters within the forebrain (Wilson et al., 1990; Ross et al., 1992). A pair of ventorostral clusters, positioned ventral to the optic stalks within the diencephalon, extend axons towards the midline at 18 hpf to form the post-optic commissure (POC). Soon after, a pair of dorsostral clusters within the telencephalon extend axons to form the anterior commissure (AC; Fig. 5A-C).

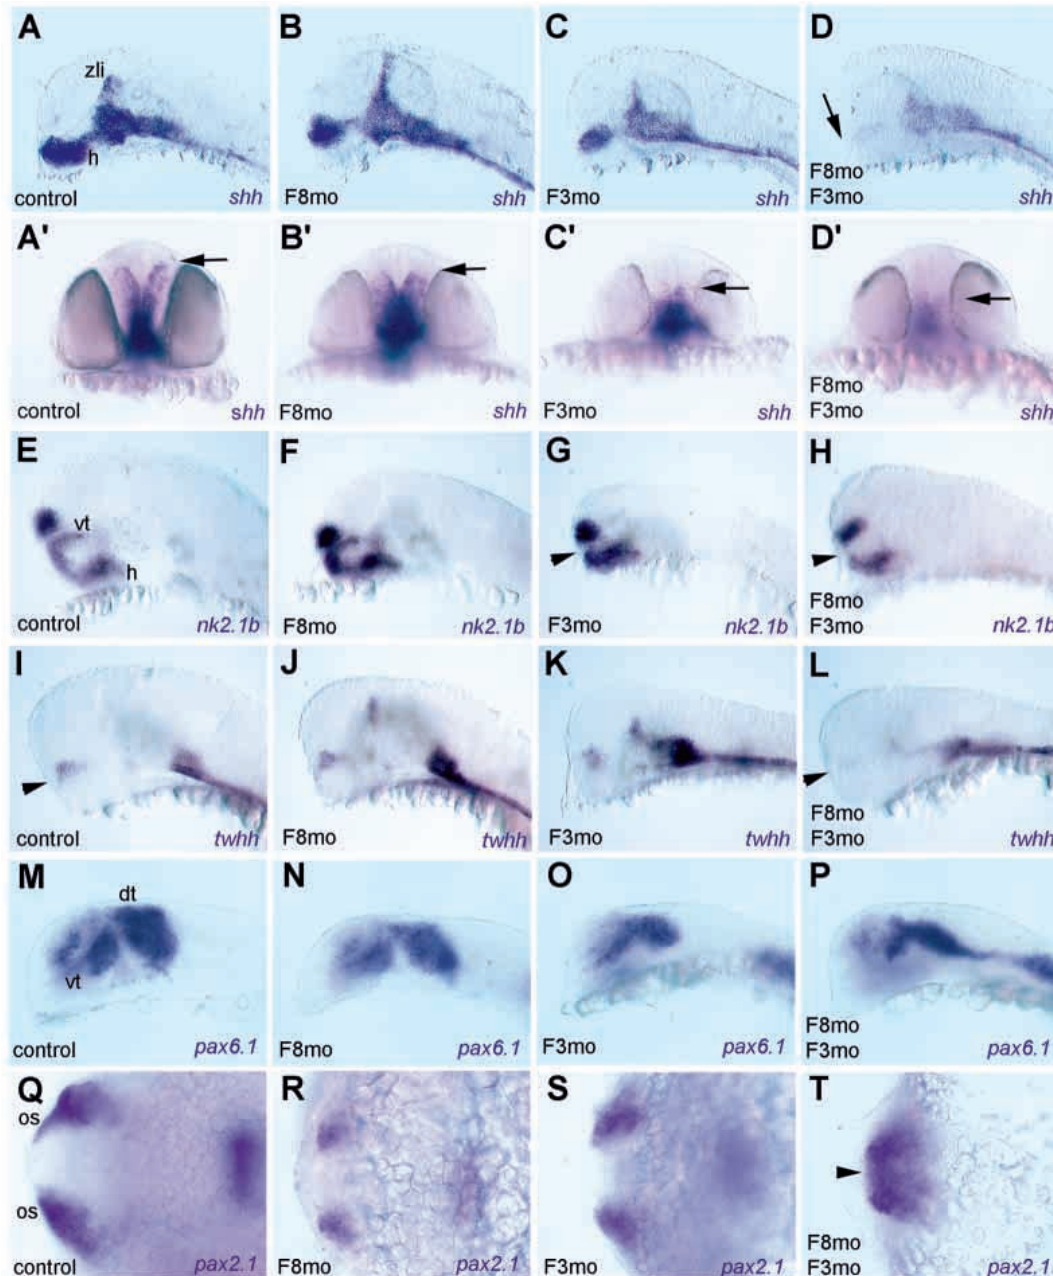

**Fig. 4.** Diencephalic gene expression is altered in the absence of Fgf8 and Fgf3. Lateral views of embryos bisected along the AP axis and with eyes removed (A-D,E-P), frontal (A'-D') or dorsal (Q-T) views. (A-D) *shh* expression at 30 hpf. Embryos mounted to show internal surface of the brain. *shh* is expressed in the ventral midline of the brain, anterior hypothalamus and ZLI in control embryos (A). *shh* expression is unaffected in embryos injected with Fgf8mo (B), is slightly reduced after injection of Fgf3mo (C), but is reduced throughout the brain, especially in the hypothalamus (arrow) and ZLI, when both Fgf3mo and Fgf8mo are injected (D). (A'-D') As A-D, but frontal views with the ZLI in focus. Arrows indicated the dorsal extent of *shh* expression. *shh* expression in the ZLI extends into the dorsal diencephalon in control (A') and Fgf8mo-injected (B') embryos. Dorsal *shh* expression in the ZLI is severely reduced in embryos injected with either Fgf3mo (C'), or both Fgf8mo and Fgf3mo (D'). (E-H) *nk2.1b* expression at 30 hpf. *nk2.1b* is expressed in the subpallial telencephalon, anterior ventral thalamus and hypothalamus in control embryos (E). Expression is unaffected in embryos injected with Fgf8mo (F), but absent (arrowhead) in embryos injected with both Fgf8mo and Fgf3mo (H). (I-L) *twhh* expression at 30 hpf. *twhh* is expressed in the anterior ventral thalamus (arrowhead) in control embryos and those injected with either Fgf8mo (J) or Fgf3mo (K), but not in those co-injected with Fgf8mo and Fgf3mo (arrowhead; L). (M-P) *pax6.1* expression at 28 hpf. In control embryos *pax6.1* is expressed in the telencephalon, posterior ventral thalamus and dorsal thalamus (M). Expression is unaltered following injection with Fgf8mo (N). *pax6.1* expression domains are smaller and merged following injection with either Fgf3mo (O), or both Fgf8mo and Fgf3mo (P). (Q-T) *pax2.1* expression in developing optic stalks (and isthmic region) at 18 hpf. Two well-separated optic stalks are present in control embryos (Q). A slight reduction in *pax2.1* expression is detected in embryos injected with Fgf8mo (R), whereas expression is relatively normal in embryos injected with Fgf3mo (S). The *pax2.1* expression domains are fused (arrowhead) in embryos injected with both Fgf8mo and Fgf3mo (T). dt, dorsal thalamus; h, hypothalamus; os, optic stalk; vt, ventral thalamus; zli, zona limitans intrathalamica.

Because morpholino injections affected forebrain midline gene expression patterns, we examined the formation of these commissures. The AC and POC were visualised using an acetylated  $\beta$ -tubulin antibody at 34 hpf, following Fgf morpholino injection (Fig. 5D-F). The AC did not form properly in embryos injected with Fgf8mo ( $n=8/19$ ), and axons with abnormal trajectories were observed in the space between the two commissures, which is normally devoid of axons, in agreement with previous results (Shanmugalingam et al., 2000). The POC developed normally in the majority of these embryos ( $n=18/19$ ; Fig. 5G-I). Commissure formation was more severely affected in embryos injected with Fgf3mo: both the AC ( $n=14/16$ ) and POC ( $n=12/16$ ) failed to form, and axons projected abnormally. In less severely affected embryos, the AC and POC were situated abnormally close together at the midline (Fig. 5J-L). Both commissures failed to form and axons projected abnormally after co-injection of Fgf3mo and Fgf8mo ( $n=9/12$ ), and in the most severe cases no axons were observed in the midline (Fig. 5M-O).

### Fgf3 is required for differentiation of forebrain neurons

Failure of commissure formation could occur as a result of a defect in the neurons themselves, or in the territory through

which the axons extend, or both. To investigate whether dorsorostral and ventrorostral cluster neurons differentiated correctly, we analysed Fgfmo-injected embryos for neuronal gene expression during early and late stages of differentiation.

*zash1a* (*asha* – Zebrafish Information Network), a member of the *achaete-scute* family of transcription factors, is expressed in the zebrafish ventral forebrain from 9 hpf, and by 18 hpf it is expressed in dorsorostral and ventrorostral clusters, and in presumptive epiphysis. *zash1a* is proposed to have a proneural function, and expression precedes neuronal differentiation (Allende and Weinberg et al., 1994). We examined *zash1a* expression at 18 hpf when the first forebrain neurons differentiate. A minority of embryos injected with Fgf8mo had reduced expression in the dorsorostral and ventrorostral clusters, with increased expression of *zash1a* in presumptive epiphysis ( $n=5/13$ ). Injection of Fgf3mo ( $n=13/13$ ), or Fgf3mo and Fgf8mo ( $n=15/15$ ), resulted in a more dramatic phenotype; dorsorostral and ventrorostral cluster expression was severely reduced or absent, whereas epiphysial expression was expanded in these embryos (Fig. 6A-D). These results indicated a potential problem with neuronal specification in dorsorostral and ventrorostral clusters in embryos lacking functional Fgfs, in particular in embryos lacking Fgf3.

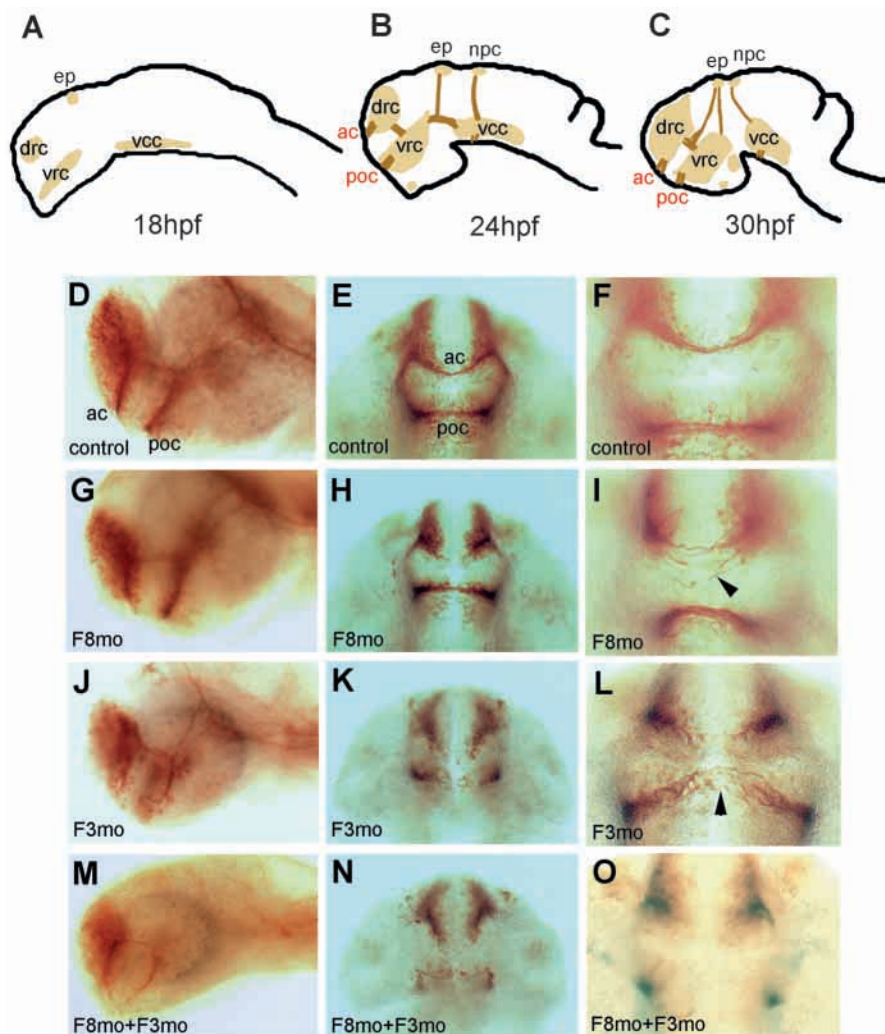

**Fig. 5.** Lack of Fgf8 or Fgf3 results in aberrant axon trajectory and failure of commissure formation in the forebrain. (A-C) Diagrams depicting neuronal clusters (light brown) and axon tracts (dark brown) during zebrafish forebrain development [from information and diagrams in Wilson et al. and Ross et al. (Wilson et al., 1990; Ross et al., 1992)]. Lateral (D,G,J,M) or frontal (E,F,H,I,K,L,N,O) views focussed on the anterior and postoptic commissures following immunocytochemistry at 34 hpf with acetylated  $\beta$ -tubulin antibodies. (D-F) Control embryos showing anterior and postoptic commissures. (G-I) Anterior commissure formation is defective in embryos injected with Fgf8mo. In some cases there is a complete failure of anterior commissure formation (H), and in other cases axons with abnormal trajectories (arrowhead) extend towards the midline (I). (J-L) Formation of both commissures is defective in embryos injected with Fgf3mo. In some cases, axons extend across the midline (arrowhead), partially forming commissures that are positioned abnormally close together (L). (M-O) There is a pronounced failure of commissure formation in the absence of both Fgf8 and Fgf3 (N). In severe cases, no axons enter the midline (O). ac, anterior commissure; drc, dorsorostral cluster; ep, epiphysis; npc, nuclei of the posterior commissure; poc, post-optic commissure; vcc, ventrocaudal cluster; vrc, ventrorostral cluster.

We also analysed the effects of inhibiting Fgf function on gene expression in differentiated neurons of the dorsorostral and ventrorostral clusters at 30 hpf. Homeobox genes *is11* and *lim1* are expressed by subsets of dorsorostral and ventrorostral cluster cells, and by other neurons within the zebrafish forebrain (Korzh et al., 1993; Toyama and Dawid, 1997). At 30 hpf, dorsorostral and ventrorostral expression of *is11* and *lim1* was unaffected in embryos lacking Fgf8 (*is11*,  $n=20/20$ ; *lim1*,  $n=18/18$ ), but was greatly reduced in embryos lacking either Fgf3 (*is11*,  $n=14/15$ ; *lim1*,  $n=14/19$ ) or both Fgfs (*is11*,  $n=18/20$ ; *lim1*,  $n=17/21$ ; Fig. 6E-L). These results suggest that Fgf3 is required for expression of both early and late neuronal markers in the dorsorostral and ventrorostral clusters, and that abnormal neuronal specification may contribute to the commissural defects observed in embryos lacking functional Fgf3.

### Forebrain patterning requires Fgf signalling at multiple developmental stages

Morpholinos can interfere with gene function from the time of their injection. Therefore, to provide an indication of the temporal requirement for Fgf signals, and also an independent assay of Fgf function, embryos were treated at different stages with the FGFR inhibitor SU5402 (Mohammadi et al., 1997) and subsequently analysed for changes in gene expression

corresponding to those observed with the Fgf morpholinos. Embryos were treated from 50% epiboly until 80% epiboly [corresponding with *fgf* expression in the shield (Walshe et al., 2002), and prior to expression in the presumptive forebrain], from 80% epiboly until tailbud (when only *fgf3* is expressed in the presumptive forebrain), continuously from 50% epiboly until tailbud, from tailbud until 8s (when *fgf3* and *fgf8* expression overlaps in the telencephalon), or from 13s until 18s (when distinct *fgf3* and *fgf8* expression begins in the diencephalon). Sister embryos were taken from each batch and analysed for *erm* expression immediately following treatment. *erm* is a transcription factor downstream of MAPK that is dependent upon Fgf signalling for its transcription in the zebrafish embryo (Raible and Brand, 2001; Roehl and Nüsslein-Volhard, 2001). In all cases, *erm* expression was eliminated from the forebrain (and other regions) of the embryo following SU5402 treatment, which indicated the effective inhibition of Fgf receptor (Fgfr) signalling (Fig. 7A-H; data not shown).

Expression of *eom* in the posterior telencephalon at 24 hpf was reduced when either Fgf3 or Fgf8 activity was compromised (see Fig. 3A-D). Embryos treated with SU5402 at different stages were therefore analysed at 24 hpf to identify when Fgfr signalling was required to establish normal *eom* expression. A small proportion of embryos treated between

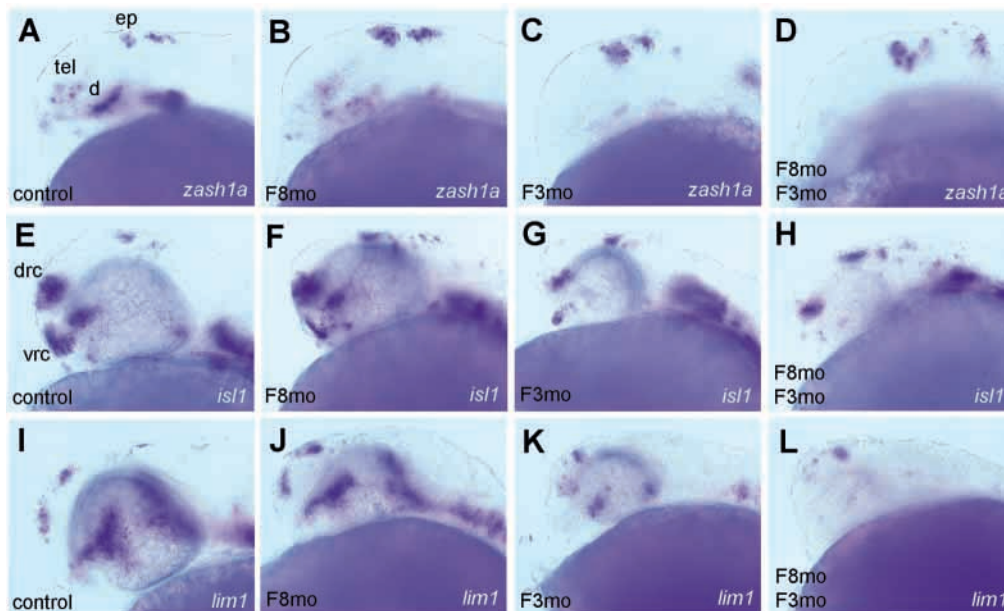

**Fig. 6.** Expression of neuronal markers is altered in embryos lacking Fgf8 and Fgf3. Lateral views of whole-mounted embryos with anterior to the left. (A-D) *zash1a* expression at 18 hpf. In control embryos, *zash1a* expression is detected in the dorsorostral cluster in the telencephalon and in the ventrorostral cluster in the diencephalon, as well as in the presumptive epiphysis (A). Injection of Fgf8mo results in a slight reduction of *zash1a* expression in neurons of the ventral diencephalon. By contrast, expression within the presumptive epiphysis is expanded (B). *zash1a* expression is lost from dorsorostral and ventrorostral clusters, but is expanded in the presumptive epiphysis in embryos injected with either Fgf3mo alone (C), or with Fgf8mo and Fgf3mo (D). (E-H) *is11* expression at 30 hpf. In control embryos, *is11* is expressed in a subset of neurons within dorsorostral and ventrorostral clusters (E). There is very little effect on *is11* expression following *fgf8mo* injection (F). *is11* expression is reduced in the dorsorostral and ventrorostral clusters in embryos injected with Fgf3mo (G), and reduced in the dorsorostral cluster and virtually absent in the ventrorostral cluster in embryos injected with both Fgf8mo and Fgf3mo (H). (I-L) *lim1* expression at 30 hpf. *lim1* is expressed in a subset of neurons within the dorsorostral and ventrorostral clusters (I), and is unaffected following Fgf8mo injection (J). Injection of Fgf3mo results in reduced *lim1* expression in many neuronal populations of the brain, including dorsorostral and ventrorostral clusters (K), whereas *lim1* expression is lacking in most neuronal populations, including the dorsorostral and ventrorostral clusters, following injection with both Fgf8mo and Fgf3mo (L). d, diencephalon; drc, dorsorostral cluster; ep, presumptive epiphysis; tel, telencephalon; vrc, ventrorostral cluster.



50% and 80% epiboly ( $n=3/19$ ), or between 80% and tailbud stages ( $n=3/17$ ), failed to express *eom* in the telencephalon. The expression domain of *eom* in the remaining embryos was expanded anteriorly. A higher proportion of embryos had reduced or undetectable *eom* expression at 24 hpf when treatment covered the entire gastrulation period (50% epiboly to tailbud stage;  $n=11/21$ ), or early somitogenesis ( $n=8/24$ ), whereas treatment at later stages failed to affect *eom* expression

(Fig. 7I-L; data not shown). These results imply that Fgf signalling can regulate *eom* expression in the developing telencephalon throughout gastrulation and early somitogenesis.

*nk2.1b* expression in the telencephalon was also examined in treated embryos. Whereas telencephalic *nk2.1b* expression was not dependent upon Fgf3 or Fgf8 function (see Fig. 4E-H), transcripts were absent in embryos treated with SU5402 between 80% and tailbud ( $n=21/21$ ), or tailbud and 8s

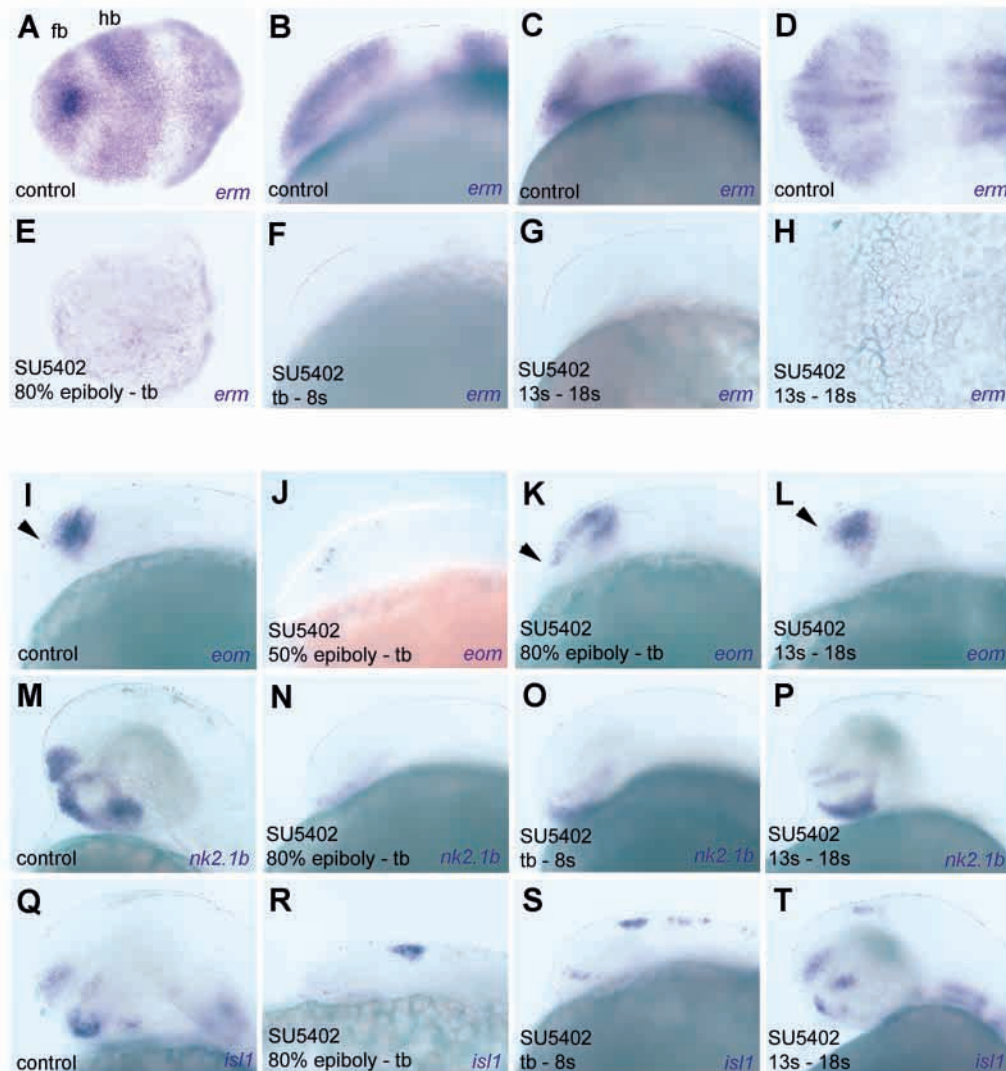

**Fig. 7.** FGF signalling is required for forebrain patterning during gastrulation and somitogenesis stages. Dorsal (A,D,E,H) or lateral (B,C,F,G,I-T) views of whole-mounted control embryos (A-D,I,M,Q), or embryos treated with SU5402 (E-H,J-L,N-P,R-T) during the developmental periods indicated. (A-H) Sister embryos taken from each batch immediately following treatment with either DMSO (A-D) or SU5402 (E-H), and analysed for expression of *erm*, an FGF-responsive gene, to test the effectiveness of inhibition. Forebrain *erm* expression is efficiently blocked by SU5402 following treatment from 80% to tailbud stage (A,E), tailbud to 8s (B,F) and 13s to 18s (C,D,G,H). After treatment, remaining embryos were allowed to develop to 24 hpf (I-L) or 30 hpf (M-T). Control embryos express *eom* in the pallial telencephalon (I). SU5402 treatment from 50% epiboly to tailbud stage eliminates *eom* expression (J), whereas treatment from 80% epiboly to tailbud results in expansion of *eom* expression into the subpallial telencephalon (K; compare arrowheads in I and K). SU5402 treatment during somite stages does not alter the *eom* expression boundary (arrowhead; L). *nk2.1b* expression in the telencephalon and diencephalon at 30 hpf in a control embryo (M). SU5402 treatment from 80% epiboly to tailbud stage (N), or from tailbud to 8s (O), completely blocks expression of *nk2.1b* in the telencephalon and reduces expression in the ventral thalamus, whereas hypothalamic expression is less affected. Treatment from 13s to 18s results in reduced *nk2.1b* expression in the telencephalon and ventral thalamus but does not affect hypothalamic expression (P). *isl1* expression in the forebrain at 30 hpf in a control embryo (Q). Although *isl1* expression in the dorsal diencephalon is expanded, all other sites of expression are reduced or eliminated following SU5402 treatment from 80% epiboly to tailbud (R), or tailbud to 8s (S). There is little effect on *isl1* expression following treatment from 13s to 18s (T). fb, forebrain; hb, hindbrain.

( $n=30/30$ ), and reduced following treatment between 13s and 18s ( $n=14/14$ ; Fig. 7M-P). These results suggest that Fgfr signalling is required continuously between 50% epiboly and 18s for correct telencephalic patterning, and that inhibition results in either loss or alteration of gene expression domains. They also indicate that other activators of Fgfrs, in addition to Fgf8 and Fgf3, regulate telencephalic patterning.

Expression of *nk2.1b* in the ventral thalamus and hypothalamus was also analysed in embryos treated with SU5402. A proportion of embryos treated between 80% epiboly and tailbud failed to express *nk2.1b* in the ventral thalamus and hypothalamus ( $n=7/21$ ), whereas remaining embryos retained some hypothalamic expression. Embryos treated between tailbud and 8s ( $n=27/30$ ), and between 13s and 18s ( $n=14/14$ ), had reduced expression in the ventral thalamus and normal expression in the hypothalamus (Fig. 7M-P). These results supported those obtained using Fgf morpholinos, which indicated the requirement for Fgf3 and Fgf8 signalling in the ventral thalamus. In addition, the results suggest that Fgfr signalling, possibly involving other Fgfs, is required for hypothalamic development during gastrulation stages, but is not required at later stages.

To examine the requirement for Fgf signalling specifically within dorsorostral and ventrorostral clusters, SU5402-treated embryos were analysed for expression of *isll* at 30 hpf. Transcripts were absent or greatly reduced following treatment between 80% epiboly and tailbud ( $n=16/16$ ), and between tailbud and 8s ( $n=22/22$ ). Notably, expression in the epiphysis was expanded in embryos treated at these stages. *isll* expression was virtually normal in the dorsorostral and ventrorostral clusters of embryos treated between 13s and 18s ( $n=26/26$ ; Fig. 7Q-T). These data suggest that neurons within the dorsorostral and ventrorostral clusters depend upon Fgfr signalling prior to 8s for specification. Moreover, they are consistent with the data obtained using Fgf3 and Fgf8 morpholinos, as both techniques resulted in reduced *isll* expression in the dorsorostral and ventrorostral clusters, and in expanded epiphysial expression.

## DISCUSSION

We investigated Fgf3 and Fgf8 function during zebrafish forebrain development, and found that complex and dynamic spatiotemporal expression underlies requirements throughout the forebrain. Following their inhibition, either singly or in combination, defects in expression of genes associated with early patterning functions were observed in telencephalon, hypothalamus, ventral thalamus, dorsal thalamus, ZLI and epiphysis (Fig. 8). Subsequent neuronal differentiation and axon pathfinding were also found to be abnormal.

Studies of murine Fgf8 function indicated roles in forebrain regionalisation (Shimamura and Rubenstein, 1997; Meyers et al., 1998; Fukuchi-Shimogori and Grove, 2001). However, although *Fgf3* is also expressed dynamically in avian and murine forebrains (Mahmood et al., 1995; Mahmood et al., 1996), no forebrain defects have been described in *Fgf3*-null mice, although detailed analyses have not been reported (Mansour et al., 1993).

In the zebrafish telencephalon, Fgf8 appears to be primarily involved in establishing anteroposterior (AP) polarity, with loss

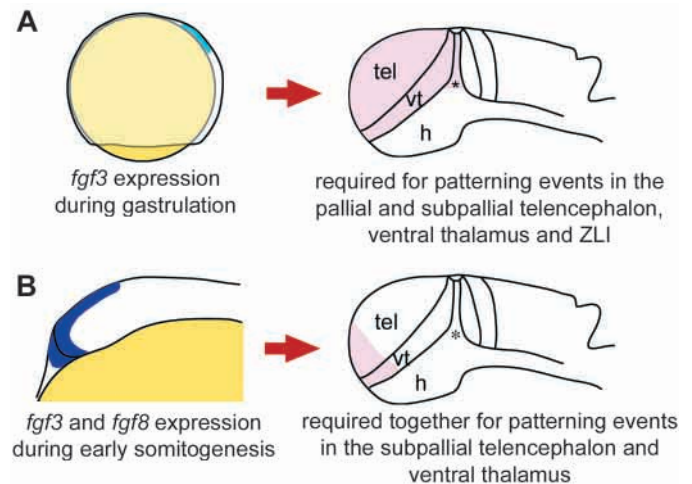

**Fig. 8.** Diagram depicting sites of *fgf3* and *fgf8* expression relative to their proposed roles in forebrain patterning in the zebrafish embryo. (A) Inhibition of Fgf signalling by SU5402 treatment prior to the onset of *fgf8* expression in the presumptive forebrain at tailbud stage results in forebrain patterning defects that correlate with those observed following injection of Fgf3mo. Based on these and other results it is proposed that *fgf3* expression during gastrulation is required for subsequent correct regional specification of the pallial telencephalon (*tbr1*), the subpallial telencephalon (*dlx2*), the ventral thalamus (*dlx2*) and the ZLI (*shh*), and for gene expression in precursor and differentiated neurons throughout the forebrain (*zash1a*, *lim1* and *isll*). (B) *fgf3* and *fgf8* expression overlaps in the dorsal telencephalon during early somitogenesis, and these Fgfs are proposed to have combined roles in patterning the subpallial telencephalon (restriction of *emx1* expression) and the anterior ventral thalamus (positive regulation of *twhh* and negative regulation of *pax2.1* expression). In addition, Fgf8 is proposed to function independently of Fgf3 in some aspects of telencephalic patterning (e.g. repression of *tbr1* and *fgf3* expression). h, hypothalamus; tel, telencephalon; vt, ventral thalamus. Asterisks indicate the ZLI. In the diagrams, the early domain of Fgf3 expression is indicated in turquoise in A; the domain of Fgf3 and Fgf8 co-expression is indicated in dark blue in B. In both figures, forebrain regions with defects are indicated in pink and yolk is depicted in yellow.

of some subpallial (anterior) markers and expansion of pallial (posterior) markers when inhibited. Thus, *sema3D* and *net1* (*ntn1* – Zebrafish Information Network) (Shanmugalingam et al., 2000) are downregulated in *ace* mutants, whereas *emx1*, *tbr1* and *fgf3* expand anteriorly (this study). Overall, these data are consistent with functions ascribed to Fgf8 in mouse embryos. In addition, our results with SU5402 show that subpallial expression of *nk2.1b* is also dependent upon Fgf signalling. This may be mediated in part by Fgf8, as others report slightly downregulated expression in the *ace* mutant and/or morpholino-injected embryos (Shanmugalingam et al., 2000; Shinya et al., 2001); however, it was unaffected in our study.

In most respects, inhibition of Fgf8 with morpholinos in this study reproduced effects on the forebrain that had been previously reported by others (Shanmugalingam et al., 2000). Notable exceptions were the failure of morpholinos to downregulate the expression of transcripts for *twhh* and *nk2.1b*. Although other explanations are possible, this may indicate incomplete inhibition of Fgf8 by the morpholino and raises the

possibility of dose-dependent requirements for this ligand in forebrain development. Unfortunately, this could not be investigated further as higher concentrations of the morpholino proved to be lethal at gastrulation stages (I.M., unpublished).

We also find roles for Fgf signalling in posterior telencephalic development, with Fgf3 required for pallial *tbr1* and *dlx2* expression, while Fgf3 and Fgf8 are required together for *eom* expression.

We and others have examined roles of Fgf signalling in telencephalic development using dominant-negative Fgfrs (dnFgfrs), Fgf inhibitors or dominant-negative Ras isoforms, an effector of Fgf signalling (this study) (Shinya et al., 2001). Inhibition of Ras activity results in a loss of telencephalic *dlx2* and *nk2.1b*, and anterior expansion of *emx1*, *eom* and *tbr1* (Shinya et al., 2001). This is not entirely consistent with the inhibition of Fgf3 and Fgf8, either singly or together: in the absence of Fgf8, *tbr1* and *emx1* expand anteriorly, whereas *eom* is downregulated by both Fgf morpholinos. Although Ras may function downstream of other receptors, anterior expansion of *tbr1* was also seen following ectopic expression of dnFgfr1iic or dnFgfr4 (also a iic isoform) (Shinya et al., 2001), which is consistent with a loss of Fgf8 function, but not a loss of Fgf3, or of both Fgf8 and Fgf3. This might reflect the specificity of Fgf3 for iiib Fgfr isoforms (Kiefer et al., 1996; Ornitz et al., 1996); because dnFgfrs are thought to function as ligand-dependent inhibitors, it is possible that the iic Fgfr isoforms would not have inhibited the Fgf3 signalling required for telencephalic *tbr1* expression. Thus, the complexity of Fgf3 and Fgf8 functions in forebrain development may reflect not only to their dynamic expression patterns, but also Fgfr ligand specificity and expression dynamics. All Fgfrs are expressed in the developing zebrafish forebrain but data is unavailable for individual Fgfr isoforms, although we have reported iiib and iic isoforms during avian forebrain development (Thisse et al., 1995; Walshe and Mason, 2000; Sleptsova-Friedrich et al., 2001; Tonou-Fujimori et al., 2002).

Surprisingly, we also found that loss of Fgf8 upregulated telencephalic *fgf3*, whereas loss of Fgf3 did not affect expression, and loss of both Fgf3 and Fgf8 together resulted in an absence of ectopic *fgf3*. These data suggest a complex interplay of Fgf activities in regulating *fgf* expression. This appears to be a common theme in the developing brain as Fgf3 and Fgf8 regulate the transcription of each other in the hindbrain (Walshe et al., 2002), and Fgf8 regulates its own transcription in the forebrain (Shanmugalingam et al., 2000).

We found that Fgf3 and Fgf8 are required for the patterning of multiple diencephalic derivatives. In ventral thalamus, the most striking defects occurred in embryos lacking both Fgf8 and Fgf3. These embryos lacked transcripts for *nk2.1b*, *twhh* and *dlx2*, and *shh* expression was reduced, with midline expression of *pax2.1* expanded. Although *shh* expression was greatly reduced, the presence of *nk2.1b* transcripts [Shh-dependent in the mouse (Shimamura and Rubenstein, 1997; Ericson et al., 1995)] and *pax2.1* [Shh-dependent in zebrafish (Macdonald et al., 1995)], indicated either that forebrain Shh function was not fully compromised or that Shh activity was required at an earlier developmental stage. Our results also confirm a previous study, which identified a role for Fgf8 in patterning the ventral thalamic midline (Shanmugalingam et al., 2000), and extend those data to provide evidence that Fgf3 is also required to pattern that tissue.

*Shh* expression is a characteristic of the ZLI, which develops as a compartment between dorsal and ventral thalami (Larsen et al., 2001). Because of its tightly regulated compartmentation, and expression of genes such as *shh* and the Wnt genes (Garda et al., 2002), the ZLI is postulated to be a signalling centre within the diencephalon. Our results show that Fgf3 function is required for the expression of *shh* in dorsal ZLI, and for the separation of adjacent ventral and dorsal thalamic *pax6.1* expression domains. Taken together, these results suggest that ventral and dorsal ZLI formation may be differentially regulated, and that Fgf3 function is required for dorsal ZLI formation. However, it seems unlikely that Fgf3 directly regulates dorsal ZLI formation as it is only detected in the ventral diencephalon at relevant stages, instead factors crucial for ZLI formation may depend upon earlier Fgf3 function for their expression or function.

Both *fgf8* and *fgf3* come to be expressed in the hypothalamus during somitogenesis. However, *shh* expression was reduced, but not abrogated, following injection with both Fgf8mo and Fgf3mo, and all other markers were unaffected, which suggested that *fgf8* and *fgf3* were not essential for most aspects of hypothalamic development. This was supported by the Fgfr inhibition studies.

The midline tissue of the ventral thalamus and subpallial telencephalon provides an important conduit for axons. *pax2.1* transcripts were upregulated in the ventral thalamic midline between the optic stalks in the absence of Fgf8 and Fgf3, a phenotype also observed in embryos after elevation of Shh, resulting in midline tissue with optic stalk morphology (Macdonald et al., 1995). Optic stalk *pax2.1* expression begins at 6-7s (MacDonald et al., 1997), when *fgf3* and *fgf8* are expressed in adjacent telencephalic tissue. Thus, Fgf3 and Fgf8 may serve to antagonise Shh, and to repress inappropriate *pax2.1* expression in midline tissue.

We found that, in the absence of Fgf8, formation of the anterior commissure was severely compromised, whereas formation of the post-optic commissure was less affected. This is consistent with a role for Fgf8 in patterning midline tissue of the subpallial telencephalon through which the anterior commissure forms. Others also identified a requirement for Fgf8 in the formation of the anterior commissure, and proposed that this was probably because of defects in the midline tissue rather than in the axons themselves (Shanmugalingam et al., 2000). In support of this, our analyses showed that lack of Fgf8 had little effect on neuronal gene expression in either ventral or dorsal rostral clusters. Loss of Fgf3 affected both commissures, consistent with a role for Fgf3 in patterning both subpallial telencephalon and ventral thalamus. However, a lack of Fgf3 also resulted in reduction or loss of proneural gene expression and differentiation markers in dorsorostral and ventrorostral clusters, but not in the loss of the clusters themselves, indicating that a problem with neuronal specification may have contributed to the commissural defects. Embryos deficient in both Fgf8 and Fgf3 exhibited more extreme commissural phenotypes but showed similar effects on neuronal markers as Fgf3mo alone.

Whereas axons extended within the midline territory following inhibition of Fgf3, inhibition of both Fgf3 and Fgf8 frequently resulted in a complete absence of axons from the midline territory.

Dynamic spatial and temporal expression of *fgf3* and *fgf8*,

coupled with both unique and combinatorial actions in forebrain development, suggested that Fgf signalling is required during multiple stages of forebrain morphogenesis. This was investigated by pharmacological inhibition of Fgfr activity during different periods of development. Our results confirmed a requirement for Fgfr activity in forebrain from at least the beginning of gastrulation until 18s. This contrasts with studies that indicate that Fgf patterning activities in hindbrain, isthmus and otic induction only require signalling during a brief, 2 hour period from late epiboly (Walshe et al., 2002; Maroon et al., 2002). It should be noted that SU5402 also produced some additional effects on gene expression and embryo morphology not observed when Fgf3 and Fgf8 were specifically inhibited. These are indicative of additional functions of Fgf signalling in forebrain development, most likely mediated by other Fgf ligands.

We thank Corinne Houart and Steve Wilson for discussion and probes. This work was supported by the Medical Research Council and the Wellcome Trust.

## REFERENCES

- Akimenko, M.-A., Ekker, M., Wegner, J., Lin, W. and Westerfield, M. (1994). Combinatorial expression of three zebrafish genes related to *distal-less*: part of a homeobox gene code for the head. *J. Neurosci.* **14**, 3475-3486.
- Allende, M. L. and Weinberg, E. S. (1994). The expression pattern of two zebrafish *achaete-scute* homolog (*ash*) genes is altered in the embryonic brain of the *cylops* mutant. *Dev. Biol.* **166**, 509-530.
- Anderson, S., Qiu, M., Bulfone, A., Eisestat, D., Meneses, J. J., Pedersen, R. A. and Rubenstein, J. L. R. (1997). Mutation of the homeobox genes *Dlx-1* and *Dlx-2* disrupt the striatal subventricular zone and differentiation of late-born striatal cells. *Neuron* **19**, 27-37.
- Brown, M., Keynes, R. and Lumsden, A. (2001). Origins of the nervous system: neural induction. In *The Developing Brain*, pp 28-92. New York: Oxford University Press.
- Crossley, P. H. and Martin, G. R. (1995). The mouse *Fgf8* gene encodes a family of polypeptides and is expressed in regions that direct outgrowth and patterning in the developing embryo. *Development* **121**, 439-451.
- Crossley, P. H., Martinez, S. and Martin, G. R. (1996). Midbrain development induced by FGF8 in the chick embryo. *Nature* **380**, 66-68.
- Crossley, P. H., Martinez, S., Ohkubo, Y. and Rubenstein, J. L. R. (2001). Coordinate expression of *FGF8*, *OTX2*, *BMP4*, and *SHH* in the rostral prosencephalon during development of the telencephalic and optic vesicles. *Neuroscience* **108**, 183-206.
- Draper, B. W., Morcos, P. A. and Kimmel, C. B. (2001). Inhibition of zebrafish *fgf8* pre-mRNA splicing with morpholino oligos: a quantifiable method for gene knockdown. *Genesis* **30**, 154-156.
- Ekker, S. C., Ungar, A. R., Greenstein, P., von Kessler, D. P., Porter, J. A., Moon, R. T. and Beachy, P. A. (1995). Patterning activities of vertebrate hedgehog proteins in the developing eye and brain. *Curr. Biol.* **5**, 944-955.
- Ericson, J., Muhr, J., Placzek, M., Lints, T., Jessell, T. M. and Edlund, T. (1995). Sonic hedgehog induces the differentiation of ventral forebrain neurons: a common signal for ventral patterning within the neural tube. *Cell* **81**, 747-756.
- Fekany-Lee, K., Gonzalez, E., Miller-Bertoglio, V. and Solnica-Krezel, L. (2000). The homeobox gene *bozozok* promotes anterior neuroectoderm formation in zebrafish through negative regulation of BMP2/4 and Wnt pathways. *Development* **127**, 2333-2345.
- Fukuchi-Shimogori, T. and Grove, E. (2001). Neocortex patterning by the secreted signalling molecule Fgf8. *Science* **294**, 1071-1074.
- Garda, A. L., Puelles, L., Rubenstein, J. L. and Medina, L. (2002). Expression patterns of Wnt8b and Wnt7b in the chicken embryonic brain suggest a correlation with forebrain patterning centers and morphogenesis. *Neuroscience* **109**, 689-698.
- Gimeno, L., Hashemi, R., Brûlet, P. and Martinez, S. (2002). Analysis of Fgf15 expression pattern in the mouse neural tube. *Brain Res. Bull.* **57**, 297-299.
- Griffin, K. J., Amacher, S. L., Kimmel, C. B. and Kimelman, D. (1998). Molecular identification of spadetail: regulation of zebrafish trunk and tail mesoderm formation by T-box genes. *Development* **125**, 3379-3388.
- Grimblat, Y., Gamse, J., Patel, M. and Sive, H. (1998). Determination of the zebrafish forebrain: induction and patterning. *Development* **125**, 4403-4416.
- Hauptmann, G., Söll, I. and Gerster, T. (2002). The early zebrafish forebrain is subdivided into molecularly distinct transverse and longitudinal domains. *Brain Res. Bull.* **57**, 371-375.
- Heisenberg, C.-P., Brand, M., Jiang, Y.-J., Warga, R. M., Beuchle, D., van Eeden, F. J. M., Furutani-Seiki, M., Granato, M., Haffter, P., Hammerschmidt, M. et al. (1996). Genes involved in forebrain development in the zebrafish, *Danio rerio*. *Development* **123**, 191-203.
- Heisenberg, C.-P., Houart, C., Take-uchi, M., Rauch, G.-J., Young, N., Coutinho, P., Masai, I., Caneparo, L., Concha, M. L., Geisler, R. et al. (2001). A mutation in the Gsk3-binding domain of zebrafish Masterblind/Axin1 leads to a fate transformation of telencephalon and eyes to diencephalon. *Genes Dev.* **15**, 1427-1434.
- Houart, C., Westerfield, M. and Wilson, S. W. (1998). A small population of anterior cells patterns the forebrain during zebrafish gastrulation. *Nature* **391**, 788-792.
- Houart, C., Caneparo, L., Heisenberg, C.-P., Barth, K. A., Take-Uchi, M. and Wilson, S. W. (2002). Establishment of the telencephalon during gastrulation by local antagonism of Wnt signaling. *Neuron* **35**, 255-265.
- Irving, C. and Mason, I. (1999). Regeneration of isthmus tissue is the result of a specific and direct interaction between rhombomere 1 and midbrain. *Development* **126**, 3981-3989.
- Irving, C. and Mason, I. (2000). Signalling by FGF8 from the isthmus patterns anterior hindbrain and establishes the anterior limit of Hox gene expression. *Development* **127**, 177-186.
- Irving, C., Malhas, A., Guthrie, S. and Mason, I. (2002). Establishing the trochlear motor axon trajectory: role of the isthmus organizer and Fgf8. *Development* **129**, 5389-5398.
- Kiefer, P., Mathieu, M., Mason, I. and Dickson, C. (1996). Secretion and mitogenic activity of zebrafish FGF3 reveal intermediate properties relative to mouse and *Xenopus* homologues. *Oncogene* **12**, 1503-1511.
- Kim, C.-H., Oda, T., Itoh, M., Jiag, D., Artinger, K. B., Chandrasekharappa, S. C., Driever, W. and Chitinis, A. B. (2000). Repressor activity of headless/Tcf3 is essential for vertebrate head formation. *Nature* **407**, 913-916.
- Kimmel, C. B., Ballard, W. W., Kimmel, S. R., Ullmann, B. and Schilling, T. F. (1995). Stages of embryonic development of the zebrafish. *Dev. Dyn.* **203**, 253-310.
- Kimura, S., Hara, Y., Pineau, T., Fernandez-Salguero, P., Fox, C. H., Ward, J. M. and Gonzalez, F. J. (1996). The *Tebp* null mouse: thyroid-specific enhancer-binding protein is essential for the organogenesis of the thyroid, lung, ventral forebrain, and pituitary. *Genes Dev.* **10**, 60-69.
- Korzh, V., Edlund, T. and Thor, S. (1993). Zebrafish primary neurons initiate expression of the LIM homeodomain protein *Isl-1* at the end of gastrulation. *Development* **118**, 417-425.
- Koshida, S., Shinya, M., Nikaido, M., Ueno, N., Schulte-Merker, S., Kuroiwa, A. and Takeda, H. (2002). Inhibition of BMP activity by the FGF signal promotes posterior neural development in zebrafish. *Dev. Biol.* **244**, 9-20.
- Krauss, S., Concordet, J.-P. and Ingham, P. W. (1993). A functionally conserved homolog of the *Drosophila* segment polarity gene *hh* is expressed in tissues with polarizing activity in zebrafish embryos. *Cell* **75**, 1431-1444.
- Krauss, S., Johansen, T., Korzh, V. and Fjose, A. (1991). Expression of the zebrafish paired box gene *pax[zf-b]* during early neurogenesis. *Development* **113**, 1193-1206.
- Larsen, C. W., Zeltser, L. M. and Lumsden, A. (2001). Boundary formation and compartment in the avian diencephalon. *J. Neurosci.* **21**, 4699-4711.
- Leger, S. and Brand, M. (2002). Fgf8 and Fgf3 are required for zebrafish ear placode induction, maintenance and inner ear patterning. *Mech. Dev.* **119**, 91-108.
- Liu, A., Losos, K. and Joyner, A. L. (1999). FGF8 can activate Gbx2 and transform regions of the rostral mouse brain into a hindbrain fate. *Development* **126**, 4827-4838.
- Macdonald, R., Barth, K. A., Xu, Q., Holder, N., Mikkola, I. and Wilson, S. W. (1995). Midline signalling is required for Pax gene regulation and patterning of the eyes. *Development* **121**, 3267-3278.
- Macdonald, R., Scholes, J., Strähle, U., Brennan, C., Holder, N., Brand, M. and Wilson, S. W. (1997). The pax protein *noi* is required for commissural axon pathway formation in the rostral forebrain. *Development* **124**, 2397-2408.

- Mahmood, R., Kiefer, P., Guthrie, S., Dickson, C. and Mason, I. (1995). Multiple roles for FGF-3 during cranial neural development in the chicken. *Development* **121**, 1399-1410.
- Mahmood, R., Mason, I. J. and Morriss-Kay, G. M. (1996). Expression of *Fgf-3* in relation to hindbrain segmentation, otic pit position and pharyngeal arch morphology in normal and retinoic acid-exposed mouse embryos. *Anat. Embryol.* **194**, 13-22.
- Mansour, S. L., Goddard, J. M. and Capocchi, M. R. (1993). Mice homozygous for a targeted disruption of the proto-oncogene *int-2* have developmental defects in the tail and inner ear. *Development* **117**, 13-28.
- Maroon, H., Walshe, J., Mahmood, R., Kiefer, P., Dickson, C. and Mason, I. (2002). *Fgf3* and *Fgf8* are required together for formation of the otic placode and vesicle. *Development* **129**, 2099-2108.
- Martinez, S., Crossley, P. H., Cobos, I., Rubenstein, J. L. and Martin, G. R. (1999). FGF8 induces formation of an ectopic isthmus organizer and isthmocerebellar development via a repressive effect on *Otx2* expression. *Development* **126**, 1189-1200.
- Mason, I. J., Fuller-Pace, F., Smith, R. and Dickson, C. (1994). FGF-7 (keratinocyte growth factor) expression during development suggests roles in myogenesis, forebrain regionalisation and epithelial-mesenchymal interactions. *Mech. Dev.* **45**, 15-30.
- Mathieu, J., Barth, A., Rosa, F. M., Wilson, S. W. and Peyri ras, N. (2002). Distinct and cooperative roles for nodal and hedgehog signals during hypothalamic development. *Development* **129**, 3055-3065.
- Maves, L., Jackman, W. and Kimmel, C. B. (2002). FGF3 and FGF8 mediate a rhombomere 4 signaling activity in the zebrafish hindbrain. *Development* **129**, 3825-3837.
- McWhirter, J. R., Goulding, M., Weiner, J. A., Chun, J. and Murre, C. (1997). A novel fibroblast growth factor gene expressed in the developing nervous system is a downstream target of the chimeric homeodomain oncoprotein E2A-Pbx1. *Development* **124**, 3221-3232.
- Meyers, E. N., Lewandoski, M. and Martin, G. R. (1998). An *Fgf8* mutant allelic series generated by Cre- and Flp-mediated recombination. *Nat. Genet.* **18**, 136-141.
- Mione, M., Shanmugalingam, S., Kimelman, D. and Griffin, K. (2001). Overlapping expression of zebrafish T-brain-1 and coesodermin during forebrain development. *Mech. Dev.* **100**, 93-97.
- Mohammadi, M., McMahon, G., Sun, L., Tang, C., Hirth, P., Yeh, B. K., Hubbard, S. R. and Schlessinger, J. (1997). Structures of tyrosine kinase domain of fibroblast growth factor in complex with inhibitors. *Science* **276**, 955-960.
- Morita, T., Nitta, H., Kiyama, Y., Mori, H. and Mishina, M. (1995). Differential expression of two zebrafish *emx* homeoprotein mRNAs in the developing brain. *Neurosci. Lett.* **198**, 131-134.
- Nornes, S., Clarkson, M., Mikkola, I., Pedersen, M., Bardsley, A., Martinez, J. P., Krauss, S. and Johansen, T. (1998). Zebrafish contains two *Pax6* genes involved in eye development. *Mech. Dev.* **77**, 185-196.
- Ornitz, D., Xu, J., Colvin, J. S., McEwen, D. G., MacArthur, C. A., Coulier, F., Gao, G. and Goldfarb, M. (1996). Receptor specificity of the fibroblast growth factor family. *J. Biol. Chem.* **271**, 15292-15297.
- Phillips, B. T., Bolding, K. and Riley, B. B. (2001). Zebrafish *fgf3* and *fgf8* encode redundant functions required for otic placode induction. *Dev. Biol.* **235**, 351-365.
- Puelles, L., Kuwana, E., Puelles, E., Bulfone, A., Shimamura, K., Keleher, J., Smiga, S. and Rubenstein, J. L. R. (2000). Pallial and subpallial derivatives in the embryonic chick and mouse telencephalon, traced by the expression of the genes *Dlx-2*, *Emx-1*, *Nkx-2.1*, *Pax-6*, and *Trbr-1*. *J. Comp. Neurol.* **424**, 409-438.
- P schel, A. W., Gruss, P. and Westerfield, M. (1992). Sequence and expression pattern of *pax-6* are highly conserved between zebrafish and mice. *Development* **114**, 643-651.
- Qiu, M., Bulfone, A., Martinez, S., Meneses, J. J., Shimamura, K., Pedersen, R. A. and Rubenstein, J. L. R. (1995). Null mutation of *Dlx-2* results in abnormal morphogenesis of proximal first and second branchial arch derivatives and abnormal differentiation in the forebrain. *Genes Dev.* **9**, 2523-2538.
- Raible, F. and Brand, M. (2001). Tight transcriptional control of the ETS domain factors *Erm* and *Pea3* by Fgf signaling during early zebrafish development. *Mech. Dev.* **107**, 105-117.
- Reifers, F., B hli, H., Walsh, E. C., Crossley, P. H., Stainier, D. Y. R. and Brand, M. (1998). *Fgf8* is mutated in zebrafish acerebellar (*ace*) mutants and is required for maintenance of midbrain-hindbrain boundary development and somitogenesis. *Development* **125**, 2381-2395.
- Reifers, F., Adams, J., Mason, I. J., Schulte-Merker, S. and Brand, M. (2000). Overlapping and distinct functions provided by *fgf17*, a new zebrafish member of the *Fgf8/17/18* subgroup of Fgfs. *Mech. Dev.* **99**, 39-49.
- Roehl, H. and N usslein-Volhard, C. (2001). Zebrafish *pea3* and *erm* are general targets of FGF8 signaling. *Current Biology* **11**, 503-507.
- Rohr, K. B., Barth, K. A., Varga, Z. M. and Wilson, S. W. (2001). The nodal pathway acts upstream of hedgehog signaling to specify ventral telencephalic identity. *Neuron* **29**, 341-351.
- Ross, L. S., Parrett, T. and Easter, S. S., Jr (1992). Axonogenesis and morphogenesis in the embryonic zebrafish brain. *J. Neurosci.* **12**, 467-482.
- Rossant, J. and Cross, J. C. (2001). Placental development: lessons from mouse mutants. *Nat. Rev. Genet.* **2**, 538-548.
- Rubenstein, J. L. R., Shimamura, K., Martinez, S. and Puelles, L. (1998). Regionalization of the prosencephalic neural plate. *Annu. Rev. Neurosci.* **21**, 445-477.
- Sato, T., Araki, I. and Nakamura, H. (2001). Inductive signal and tissue responsiveness defining the tectum and the cerebellum. *Development* **128**, 2461-2469.
- Shamim, H., Mahmood, R., Logan, C., Doherty, P., Lumsden, A. and Mason, I. (1999). Sequential roles for *Fgf4*, *En1* and *Fgf8* in specification and regionalisation of the midbrain. *Development* **126**, 945-959.
- Shanmugalingam, S., Houart, C., Picker, A., Reifers, F., Macdonald, R., Barth, A., Griffin, K., Brand, M. and Wilson, S. W. (2000). *Ace/Fgf8* is required for forebrain commissure formation and patterning of the telencephalon. *Development* **127**, 2549-2561.
- Shimamura, K. and Rubenstein, J. L. R. (1997). Inductive interactions direct early regionalization of the mouse forebrain. *Development* **124**, 2709-2718.
- Shinya, M., Koshida, S., Sawada, A., Kuroiwa, A. and Takeda, H. (2001). Fgf signalling through MAPK cascade is required for development of the subpallial telencephalon in zebrafish embryos. *Development* **128**, 4153-4164.
- Sleptsova-Friedrich, I., Li, Y., Emelyanov, A., Ekker, M., Korzh, V. and Ge, R. (2001). *Fgfr3* and regionalization of anterior neural tube in zebrafish. *Mech. Dev.* **102**, 213-217.
- Smith, J. C., Price, B. M. J., Green, J. B. A., Weigel, D. and Herrmann, B. G. (1991). Expression of a *Xenopus* homolog of Brachyury (T) is an immediate-early response to mesoderm induction. *Cell* **67**, 79-87.
- Thisse, B., Thisse, C. and Weston, J. A. (1995). Novel FGF receptor (*Z-FGFR4*) is dynamically expressed in mesoderm and neurectoderm during early zebrafish embryogenesis. *Dev. Dyn.* **203**, 377-391.
- Tonou-Fujimori, N., Takahashi, M., Onodera, H., Kikuta, H., Koshida, S., Takeda, H. and Yamasu, K. (2002). Expression of the FGF receptor 2 gene (*fgfr2*) during embryogenesis in the zebrafish *Danio rerio*. *Gene Expr. Patterns* **2**, 183-188.
- Toyama, R. and Dawid, I. B. (1997). *lim6*, a novel LIM homeobox gene in the zebrafish: comparison of its expression pattern with *lim1*. *Dev. Dyn.* **209**, 406-417.
- Varga, Z. M., Amores, A., Lewis, K. E., Yan, Y.-L., Postlethwait, J. H., Eisen, J. S. and Westerfield, M. (2001). Zebrafish *smoothened* functions in ventral neural tube specification and axon tract formation. *Development* **128**, 3497-3509.
- Walshe, J. and Mason, I. (2000). Expression of FGFR1, FGFR2 and FGFR3 during early neural development in the chick embryo. *Mech. Dev.* **90**, 103-110.
- Walshe, J., Maroon, H., McGonnell, I. M., Dickson, C. and Mason, I. (2002). Establishment of hindbrain segmental identity requires signaling by FGF3 and FGF8. *Curr. Biol.* **12**, 1117-1123.
- Wilson, S. W., Ross, L., Parrett, T. and Easter, S. S., Jr (1990). The development of a simple scaffold of axon tracts in the brain of the embryonic zebrafish, *Brachydanio rerio*. *Development* **108**, 121-145.
- Wilson, S. W. and Rubenstein, J. L. R. (2000). Induction and dorsoventral patterning of the telencephalon. *Neuron* **28**, 641-651.
- Woo, K. and Fraser, S. E. (1995). Order and coherence in the fate map of the zebrafish nervous system. *Development* **121**, 2529-2609.
- Xu, J., Liu, Z. and Ornitz, D. M. (2000). Temporal and spatial gradients of *Fgf8* and *Fgf17* regulate proliferation and differentiation of midline cerebellar structures. *Development* **127**, 1833-1843.
- Zeltser, L. M., Larsen, C. W. and Lumsden, A. (2001). A new developmental compartment in the forebrain regulated by *Lunatic fringe*. *Nat. Neurosci.* **4**, 683-684.
